# Supplementary material for: Clinical Decision Making and Mental Health Service Use Among Persons With Severe Mental Illness Across Europe
Source: Atypon-hosted journal article supplement (doi:10.1176/appi.ps.201600114), 2017-05-15
Supplement: appi.ps.201600114.ds001.pdf [file appi.ps.201600114.ds001.pdf]

## **Appendix 1: Measures**

Client Sociodemographic and Service Use Inventory (CSSRI-EU). The CSSRI-EU (1) provides self-report information in five areas: a) sociodemographic data including ethnicity and education level, b) living situation, c) employment and income, d) service receipt such as inpatient and outpatient hospital services, primary and secondary community care contacts, and e) medication use. For pragmatic reasons, the data on medication was assessed using a shortened version of the CSSRI (Paul McCrone, personal communication), with patients being asked to indicate type (psychotropic or non-psychotropic) and number of medications (while the original version also asks for brand name and dose). Community and outpatient services for the prior three months, and number of medications used in the previous one month, were collected. Number and duration of inpatient stays was collected for the previous 12 months. Total costs of inpatient days were calculated by allocating unit costs based on average costs per day of inpatient stays in each participating center during the observation period.

Clinical Decision Making Style Scale (CDMS). The CDMS (2) measures preferences for CDM. Identically structured parallel versions of the CDMS have been designed for staff and patients. The CDMS is divided into three sections and yields two subscales: Participation in Decision Making (PD) and Information (IN). PD is measured by two sections: a) agreement on a 5-point Likert scale with six items such as "important decisions should be made by the clinician in charge and not by me" and b) ratings on nine items regarding if the decision should be made by the clinician, patient or shared, based on three vignettes in the areas of work, medication and side effects. The PD subscale score is then classified into one of three categories: a preference for active, shared, or passive decision making. The IN subscale is measured by agreement on a 5-point Likert scale with six items regarding the need of the patient to receive information. Scores are categorized into preference for either high, moderate, or low levels of information provision.

Clinical Decision Making Involvement and Satisfaction Scale (CDIS)(3). This instrument measures involvement and satisfaction with a recently experienced clinical decision, as rated by both patient and staff. The Involvement (CDIS-INV) subscale is assessed through a single item rating the extent to which the decision was shared, passive or actively made by the patient (rated on a 5-point scale). The Satisfaction (CDIS-SAT) subscale is assessed by level of agreement on a 5-point Likert scale with six items regarding a) being informed, b) making the best decision, c) consistency with

personal values, d) expectation of implementing the decision, e) whether this was the best decision to make, and f) overall satisfaction. The satisfaction score is then classified into three categories: high, moderate and low. CEDAR measures and scoring information can be downloaded at [www.cedar-net.eu/instruments](http://www.cedar-net.eu/instruments).

1. Chisholm D, Knapp MR, Knudsen HC, et al.: Client Socio-Demographic and Service Receipt Inventory--European Version: development of an instrument for international research. EPSILON Study 5. European Psychiatric Services: Inputs Linked to Outcome Domains and Needs. The British Journal of Psychiatry:s28-33, 2000
2. Puschner B, Neumann P, Jordan H, et al.: Development and psychometric properties of a five-language multiperspective instrument to assess clinical decision making style in the treatment of people with severe mental illness (CDMS) BMC Psychiatry 13:48, 2013
3. Slade M, Jordan H, Clarke E, et al.: The development and evaluation of a five-language multiperspective standardised measure: clinical decision-making involvement and satisfaction (CDIS). BMC Health Services Research 28:323, 2014



**Appendix 2: Self-reported service use at baseline and 12-month follow up (N =578)**

|                                           | Baseline |     |          | 12-month<br>follow up |     |          | Z <sup>a</sup> | P-value <sup>b</sup> |
|-------------------------------------------|----------|-----|----------|-----------------------|-----|----------|----------------|----------------------|
|                                           | Total    | Md  | IQR      | Total                 | Md  | IQR      |                |                      |
| Inpatient days (previous year)            | 6547     | 0.0 | 0.0-1.0  | 2871                  | 0.0 | 0.0-0.0  | -4.31          | <.001                |
| Inpatient stays (previous year)           | 201      | 0.0 | 0.0-1.0  | 137                   | 0.0 | 0.0-0.0  | -3.26          | <.001                |
| Outpatient visits (previous 3 months)     | 2716     | 1.0 | 1.0-6.0  | 3165                  | 2.0 | 2.0-5.0  | -0.27          | .787                 |
| Day services (previous 3 months)          | 2683     | 0.0 | 0.0-1.0  | 2236                  | 0.0 | 0.0-0.0  | -1.74          | .081                 |
| Community contacts (previous 3 months)    | 5769     | 5.0 | 1.0-14.0 | 5106                  | 5.0 | 5.0-12.0 | -2.42          | .016                 |
| Psychotropic medications (previous month) | 1555     | 2.0 | 2.0-4.0  | 1332                  | 2.0 | 1.0-3.0  | -2.25          | .024                 |

Notes: Md = median; IQR = interquartile range; <sup>a</sup>Wilcoxon signed-rank test; <sup>b</sup> Bonferroni adjusted p = 0.05/6 = 0.008

### Appendix 3: Supplemental references

1. van der Krieke, Lian, Emerencia AC, Boonstra N, et al: A web-based tool to support shared decision making for people with a psychotic disorder: randomized controlled trial and process evaluation. *Journal of Medical Internet Research* 15:e216, 2013
2. Calsyn RJ, Winter JP, Morse GA: Do consumers who have a choice of treatment have better outcomes? *Community Mental Health Journal* 36:149–160, 2000
3. Legare F, Witteman HO: Shared decision making: examining key elements and barriers to adoption into routine clinical practice. *Health Affairs* 32:276–284, 2013
4. Drake RE, Deegan PE, Rapp C: The promise of shared decision making in mental health. *Psychiatric Rehabilitation Journal* 34:7–13, 2010
5. McCabe R, Priebe S: Communication and psychosis: it's good to talk, but how? *The British Journal of Psychiatry* 192:404–405, 2008
6. Torrey WC, Drake RE: Practicing shared decision making in the outpatient psychiatric care of adults with severe mental illnesses: redesigning care for the future. *Community Mental Health Journal* 46:433–440, 2010
7. De las Cuevas, Carlos, Rivero A, Perestelo-Perez L, et al: Psychiatric patients' attitudes towards concordance and shared decision making. *Patient Education and Counseling* 85:245–250, 2011
8. Woltmann EM, Whitley R: Shared decision making in public mental health care: perspectives from consumers living with severe mental illness. *Psychiatric Rehabilitation Journal* 34:29–36, 2010
9. Hamann J, Cohen R, Leucht S, et al: Do patients with schizophrenia wish to be involved in decisions about their medical treatment? *The American Journal of Psychiatry* 162:2382–2384, 2005
10. Edwards K: Service users and mental health nursing. *Journal of Psychiatric and Mental Health Nursing* 7:555–565, 2000
11. Stein BD, Kogan JN, Mihalyo MJ, et al: Use of a computerized medication shared decision making tool in community mental health settings: impact on psychotropic medication adherence. *Community Mental Health Journal* 49:185–192, 2013
12. Matthias MS, Salyers MP, Rollins AL, et al: Decision making in recovery-oriented mental health care. *Psychiatric Rehabilitation Journal* 35:305–314, 2012
13. Möller HJ, Jäger M, Riedel M, et al: The Munich 15-year follow-up study (MUFSSAD) on first-hospitalized patients with schizophrenic or affective disorders: assessing courses, types and time stability of diagnostic classification. *European Psychiatry* 26:231–243, 2010
14. Clarke E, Puschner B, Jordan H, Williams P, Konrad J, Kawohl W, Bär A, Rössler W, Del Vecchio V, Sampogna G, Nagy M, Süveges A, Krogsgaard Bording M, Slade M Empowerment and satisfaction in a multinational study of routine clinical practice, *Acta Psychiatrica Scandinavica*, in press).
15. Chewning B, Bylund CL, Shah B, Arora NK, Gueguen JA, Makoul G. Patient preferences for shared decisions: a systematic review. *Patient Educ Couns* 2012; 86(1): 9-18
16. Decoux M: Acute versus primary care: the health care decision making process for individuals with severe mental illness. *Issues in Mental Health Nursing* 26:935–951, 2005
17. Cummings SM, Cassie KM: Perceptions of biopsychosocial services needs among older adults with severe mental illness: met and unmet needs. *Health & Social Work* 33:133–143, 2008
18. Hamann J, Mendel R, Meier A, et al: "How to speak to your psychiatrist": shared decision-making training for inpatients with schizophrenia. *Psychiatric Services* 62:1218–1221, 2011
19. Woltmann EM, Wilkniss SM, Teachout A, et al: Trial of an Electronic Decision Support System to Facilitate Shared Decision Making in Community Mental Health. *Psychiatric Services* 62:54–60, 2011
